# Supplementary material for: Polygenic Score for Body Mass Index Is Associated with Disordered Eating in a General Population Cohort
Source: MDPI journal article supplement (doi:10.3390/jcm9041187), 2020-04-21
Supplement: s1 [file s1]

### Quality control checks of genotyping data

Individuals with disproportionate levels of individual missingness (i.e., >3%), insufficient sample replication (identity by descent < 0.1), biological sex mismatch, and non-European ancestry (as defined by multi-dimensional scaling using the HapMap Phase II, release 22, reference populations) were excluded. SNPs with a minor allele frequency (MAF) of < 1%, excessive missingness (i.e., call rate < 95%), or a departure from the Hardy–Weinberg equilibrium ( $P$  value <  $5 \times 10^{-7}$ ) were removed. Imputation was conducted with Impute3 using the HRC 1.0 as the reference panel [1] and phasing was carried out using ShapeIT (v2.r644). Finally, post-imputation quality control checks were performed; any SNPs with MAF less than 1%, Impute3 information quality metric of < 0.8, and not confirming to Hardy–Weinberg equilibrium ( $P < 5 \times 10^{-7}$ ) were removed. After data cleaning, a total of 8,654 individuals (4,225 females and 4,429 males) and 4,054,653 SNPs remained eligible for analyses.

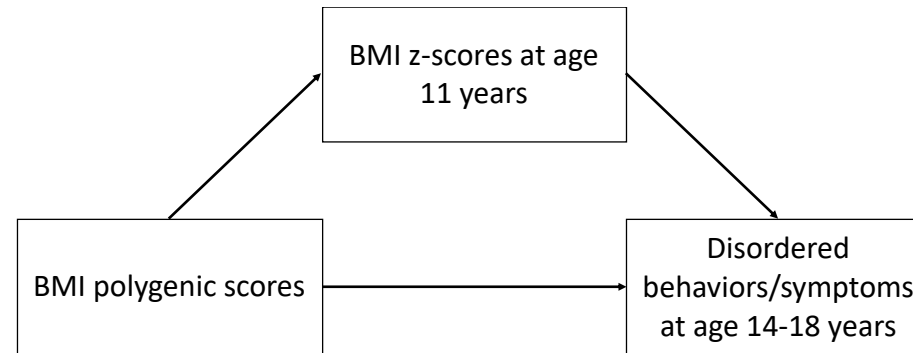

**Figure 1. Directed acyclic graph (DAG) of the causal mediation analyses.** The body mass index polygenic scores (BMI-PGS) was derived from summary statistics of the genome-wide association study (GWAS) carried out by the Genetic Investigation of Anthropometric Traits (GIANT) consortium [8] and were calculated for participants in the Avon Longitudinal Study of Parents and Children [4–7]. The sex and age adjusted BMI z-scores were included as a mediator in the causal mediation analyses that was carried out using the R package ‘mediation’ (version 4.4.6; 32). The ‘mediation’ package is based on concepts proposed in modern causal inference [9]. Prior to the mediation analyses the BMI-PGS was standardized (to mean zero and standard deviation of one) and the analyses were controlled for biological sex and the first four ancestry-informative principal components. Confounders are not included in this DAG for simplicity.

**Table 1.** Age, sex, and ethnicity of the participants in the Avon Longitudinal Study of Parents and Children at all three time points.

| Wave | Age in years (SD) | Female N (%) | Child ancestry/ white ethnicity N (%) |
|------|-------------------|--------------|---------------------------------------|
| 14   | 14.0 (0.19)       | 3,416 (55.5) | 5,372 (87.2)                          |
| 16   | 16.7 (0.24)       | 3,095 (58.7) | 4,482 (86.0)                          |
| 18   | 18.7 (0.49)       | 2,174 (64.2) | 3,010 (88.9)                          |

**Table 2.** Associations of body mass index polygenic score (BMI-PGS) with BMI in the Avon Longitudinal Study of Parents and Children.

| Outcome      | Age outcome measured (years) | N    | Threshold <sup>a</sup> | N SNPs | R <sup>2</sup> | $\beta$ (95% CI) <sup>b</sup> | Q <sup>c</sup>          |
|--------------|------------------------------|------|------------------------|--------|----------------|-------------------------------|-------------------------|
| BMI          | 11                           | 5371 | 0.0180001              | 19457  | 0.110480       | 1.14 (1.05, 1.22)             | 9.09 × 10 <sup>-5</sup> |
| BMI z-scores | 11                           | 4037 | 0.0180001              | 19457  | 0.123235       | 0.40 (1.05, 1.22)             | 9.09 × 10 <sup>-5</sup> |
| BMI          | 18                           | 3931 | 0.0230001              | 21040  | 0.121126       | 1.44 (1.31, 1.56)             | 9.09 × 10 <sup>-5</sup> |

SNP = single nucleotide polymorphism; R<sup>2</sup>, squared multiple correlation; OR, odds ratio; CI, confidence interval. <sup>a</sup> The optimal *P*-value threshold for the inclusion of SNPs in the calculation of the body mass index (BMI) polygenic score (PGS) as determined by PRSice's high-resolution scoring [2]. <sup>b</sup> Standardized betas reflect one standard deviation increase in the standardized (to mean zero and standard deviation of one) BMI-PGS. <sup>c</sup> Benjamini & Hochberg false discovery rate adjusting for the number of phenotypes tested [3].

**Table 3.** Effect size of associations of body mass index polygenic score (BMI-PGS) with disordered eating behaviors and cognitions in the total samples and separately for female participants of the Avon Longitudinal Study of Parents and Children.

| Binary outcomes            | Age outcome measured (years) | Total sample                  | Females <sup>a</sup>          |
|----------------------------|------------------------------|-------------------------------|-------------------------------|
|                            |                              | OR (95% CI) <sup>b</sup>      | OR (95% CI) <sup>b</sup>      |
| Fasting                    | 14                           | 1.45 (1.28, 1.64)             | 1.43 (1.25, 1.64)             |
| Fasting                    | 16                           | 1.30 (1.18, 1.43)             | 1.27 (1.15, 1.42)             |
| Fasting                    | 18                           | 1.26 (1.06, 1.51)             | 1.26 (1.05, 1.52)             |
| Binge eating               | 14                           | 1.29 (1.14, 1.47)             | 1.27 (1.08, 1.49)             |
| Binge eating               | 16                           | 1.22 (1.10, 1.35)             | 1.18 (1.05, 1.33)             |
| Binge eating               | 18                           | 1.23 (1.10, 1.39)             | 1.25 (1.09, 1.43)             |
| Purging                    | 16                           | 1.24 (1.08, 1.42)             | 1.23 (1.07, 1.42)             |
| Purging                    | 18                           | 1.21 (1.03, 1.43)             | 1.21 (1.02, 1.44)             |
| Continuous outcomes        | Age outcome measured (years) | $\beta$ (95% CI) <sup>c</sup> | $\beta$ (95% CI) <sup>c</sup> |
| Thin ideal internalization | 14                           | -0.15 (-0.23, -0.07)          | -0.15 (-0.24, 0.05)           |
| Body dissatisfaction       | 14                           | 0.99 (0.77, 1.22)             | 1.24 (0.92, 1.55)             |
| Restrained eating          | 14                           | 0.14 (0.10, 0.17)             | 0.16 (0.11, 0.21)             |
| Emotional eating           | 14                           | 0.21 (0.052, 0.38)            | -0.10 (-0.34, 0.14)           |
| External eating            | 14                           | -0.19 (-0.30, -0.09)          | -0.18 (-0.32, -0.05)          |

OR, odds ratio; CI, confidence interval. <sup>a</sup> Polygenic score analyses only carried out in female participants. <sup>b</sup> ORs reflect one standard deviation change in the standardized (to mean zero and standard deviation of one) BMI-PGS. <sup>c</sup> Standardized betas reflect one standard deviation increase in the standardized (to mean zero and standard deviation of one) BMI-PGS.

**Table 4.** Generalized linear mixed models for the association between the body mass index polygenic score (BMI-PGS) and the disordered eating behaviors with age at self-report of the disordered eating as an interaction term <sup>a</sup>.

| Outcome      | Threshold <sup>b</sup> | N SNPs | $\chi^2$ | $P_{interaction}$ |
|--------------|------------------------|--------|----------|-------------------|
| Fasting      | 1                      | 81,503 | 4.89     | 0.09              |
| Binge eating | 1                      | 81,503 | 5.23     | 0.07              |
| Purging      | 1                      | 81,503 | 0.19     | 0.66              |

SNP = single nucleotide polymorphism;  $\chi^2$ , test statistic as measured by chi-square. <sup>a</sup> Analyses were corrected for biological sex and the first four ancestry-informative principal components for the individuals in the Avon Longitudinal Study of Parents and Children. [4–7]. <sup>b</sup>  $P$ -value threshold for the inclusion of SNPs in the calculation of the BMI-PGS was set to 1 using PRSice [2].

## References

1. McCarthy, S.; Das, S.; Kretzschmar, W.; Delaneau, O.; Wood, A.R.; Teumer, A.; Kang, H.M.; Fuchsberger, C.; Danecek, P.; Sharp, K.; et al. A reference panel of 64,976 haplotypes for genotype imputation. *Nat. Genet.* **2016**, *48*, 1279–1283.
2. Euesden, J.; Lewis, C.M.; O'Reilly, P.F. PRSice: Polygenic Risk Score software. *Bioinformatics* **2015**, *31*, 1466–1468.
3. Benjamini, Y.; Hochberg, Y. Controlling the False Discovery Rate : a Practical and Powerful Approach to Multiple Testing. *J. R. Stat. Soc. Ser. B* **1995**, *57*, 289–300.
4. Boyd, A.; Golding, J.; Macleod, J.; Lawlor, D.A.; Fraser, A.; Henderson, J.; Molloy, L.; Ness, A.; Ring, S.; Smith, G.D. Cohort profile: The 'Children of the 90s'-The index offspring of the avon longitudinal study of parents and children. *Int. J. Epidemiol.* **2013**, *42*, 111–127.
5. Fraser, A.; Macdonald-wallis, C.; Tilling, K.; Boyd, A.; Golding, J.; Davey smith, G.; Henderson, J.; Macleod, J.; Molloy, L.; Ness, A.; et al. Cohort profile: The avon longitudinal study of parents and children: ALSPAC mothers cohort. *Int. J. Epidemiol.* **2013**, *42*, 97–110.
6. Golding; Pembrey; Jones; The Alspac Study Team ALSPAC-The Avon Longitudinal Study of Parents and Children. *Paediatr. Perinat. Epidemiol.* **2001**, *15*, 74–87.
7. Golding, J.; Team, S. The Avon Longitudinal Study of Parents and Children ( ALSPAC ) – study design and collaborative opportunities. **2004**, 119–123.
8. Yengo, L.; Sidorenko, J.; Kemper, K.E.; Zheng, Z.; Wood, A.R.; Weedon, M.N.; Frayling, T.M.; Hirschhorn, J.; Yang, J.; Visscher, P.M. Meta-analysis of genome-wide association studies for height and body mass index in ~700000 individuals of European ancestry. *Hum. Mol. Genet.* **2018**, *27*, 3641–3649.
9. VanderWeele, T. *Explanation in causal inference: methods for mediation and interaction*; Oxford University Press, 2015;
